# Supplementary material for: Transmission Chains of Extended-Spectrum Beta-Lactamase-Producing Enterobacteriaceae at the Companion Animal Veterinary Clinic–Household Interface
Source: PubMed Central journal article supplement (PMC7914568; doi:10.3390/antibiotics10020171), 2021-02-09
Supplement: antibiotics-10-00171-s001.pdf [file antibiotics-10-00171-s001.pdf]

**Table S2:** Questionnaire for the owners of colonized pets

| Category          | Question |                                           | Answer options                                                                                                                                                                                                                                                                                                                                                                                                                                                                                                                                                                                                                              | Household 1                                                                                                        | Household 2                                                                                                        |
|-------------------|----------|-------------------------------------------|---------------------------------------------------------------------------------------------------------------------------------------------------------------------------------------------------------------------------------------------------------------------------------------------------------------------------------------------------------------------------------------------------------------------------------------------------------------------------------------------------------------------------------------------------------------------------------------------------------------------------------------------|--------------------------------------------------------------------------------------------------------------------|--------------------------------------------------------------------------------------------------------------------|
| General questions | 1        | Please specify your gender                | <input type="checkbox"/> Male <input type="checkbox"/> Female                                                                                                                                                                                                                                                                                                                                                                                                                                                                                                                                                                               | <input type="checkbox"/> Female                                                                                    | <input type="checkbox"/> Male<br><br><input type="checkbox"/> Female                                               |
|                   | 2        | Please specify your age                   |                                                                                                                                                                                                                                                                                                                                                                                                                                                                                                                                                                                                                                             | 41                                                                                                                 | 39 (owner 1), 48 (owner 2)                                                                                         |
|                   | 3        | How many people live in your household?   | <input type="checkbox"/> 1 <input type="checkbox"/> 2 <input type="checkbox"/> 3 <input type="checkbox"/> 4 <input type="checkbox"/> 5 <input type="checkbox"/> 6 <input type="checkbox"/> 7 <input type="checkbox"/> 8<br><input type="checkbox"/> 9 <input type="checkbox"/> 10+                                                                                                                                                                                                                                                                                                                                                          | <input type="checkbox"/> 1                                                                                         | <input type="checkbox"/> 2                                                                                         |
|                   | 4        | How many children live in your household? | <input type="checkbox"/> 0 <input type="checkbox"/> 1 <input type="checkbox"/> 2 <input type="checkbox"/> 3 <input type="checkbox"/> 4 <input type="checkbox"/> 5 <input type="checkbox"/> 6 <input type="checkbox"/> 7<br><input type="checkbox"/> 8 <input type="checkbox"/> 9 <input type="checkbox"/> 10+                                                                                                                                                                                                                                                                                                                               | <input type="checkbox"/> 0                                                                                         | <input type="checkbox"/> 0                                                                                         |
|                   | 5        | How many pets live in your household?     | Dogs: <input type="checkbox"/> 0 <input type="checkbox"/> 1 <input type="checkbox"/> 2 <input type="checkbox"/> 3 <input type="checkbox"/> 4 <input type="checkbox"/> 5 <input type="checkbox"/> 6 <input type="checkbox"/> 7 <input type="checkbox"/> 8 <input type="checkbox"/> 9 <input type="checkbox"/> 10+<br><br>Cats: <input type="checkbox"/> 0 <input type="checkbox"/> 1 <input type="checkbox"/> 2 <input type="checkbox"/> 3 <input type="checkbox"/> 4 <input type="checkbox"/> 5 <input type="checkbox"/> 6<br><input type="checkbox"/> 7 <input type="checkbox"/> 8 <input type="checkbox"/> 9 <input type="checkbox"/> 10+ | Dogs: <input type="checkbox"/> 1<br><br>Cats: <input type="checkbox"/> 0<br><br>Others: <input type="checkbox"/> 0 | Dogs: <input type="checkbox"/> 2<br><br>Cats: <input type="checkbox"/> 2<br><br>Others: <input type="checkbox"/> 0 |

|  |    |                                                 |                                                                                                                                                                                                                                                                                                                                                                                                                       |                               |                                              |
|--|----|-------------------------------------------------|-----------------------------------------------------------------------------------------------------------------------------------------------------------------------------------------------------------------------------------------------------------------------------------------------------------------------------------------------------------------------------------------------------------------------|-------------------------------|----------------------------------------------|
|  |    |                                                 | Others: <input type="checkbox"/> 0 <input type="checkbox"/> 1 <input type="checkbox"/> 2 <input type="checkbox"/> 3 <input type="checkbox"/> 4 <input type="checkbox"/> 5 <input type="checkbox"/><br><input type="checkbox"/> 6 <input type="checkbox"/> 7 <input type="checkbox"/> 8 <input type="checkbox"/> 9 <input type="checkbox"/> 10+                                                                        |                               |                                              |
|  | 6  | Where do you live?                              | <input type="checkbox"/> City <input type="checkbox"/> Town <input type="checkbox"/> Countryside                                                                                                                                                                                                                                                                                                                      | <input type="checkbox"/> Town | <input type="checkbox"/> Countryside         |
|  | 7  | What is your job activity?                      |                                                                                                                                                                                                                                                                                                                                                                                                                       | Surgical cosmetician          | Care professional<br>(works in nursing home) |
|  | 8  | Do you work in the healthcare system?           | <input type="checkbox"/> Yes <input type="checkbox"/> No                                                                                                                                                                                                                                                                                                                                                              | <input type="checkbox"/> No   | <input type="checkbox"/> Yes                 |
|  | 9  | Do you work with animals?                       | <input type="checkbox"/> Yes <input type="checkbox"/> No [skip Q10/11]                                                                                                                                                                                                                                                                                                                                                | <input type="checkbox"/> No   | <input type="checkbox"/> No                  |
|  | 10 | If YES: Which animals do you work with?         | <input type="checkbox"/> Cattle <input type="checkbox"/> Sheep <input type="checkbox"/> Goat <input type="checkbox"/> Pig <input type="checkbox"/><br><input type="checkbox"/> Poultry <input type="checkbox"/> Horse <input type="checkbox"/> Dogs <input type="checkbox"/> Cats <input type="checkbox"/><br><input type="checkbox"/> Reptiles <input type="checkbox"/> Small rodents <input type="checkbox"/> Other | n.a.                          | n.a.                                         |
|  | 11 | How often do you have contact to these animals? | <input type="checkbox"/> Every day <input type="checkbox"/> Every other day <input type="checkbox"/><br><input type="checkbox"/> Twice a week <input type="checkbox"/> Once a week <input type="checkbox"/><br><input type="checkbox"/> Once every two weeks <input type="checkbox"/> Once a                                                                                                                          | n.a.                          | n.a.                                         |

|                       |    |                                                  |                                                                                                                                                                                                                                                                                                                                  |                                                                                                                   |                                                                                                                   |
|-----------------------|----|--------------------------------------------------|----------------------------------------------------------------------------------------------------------------------------------------------------------------------------------------------------------------------------------------------------------------------------------------------------------------------------------|-------------------------------------------------------------------------------------------------------------------|-------------------------------------------------------------------------------------------------------------------|
|                       |    |                                                  | month <input type="checkbox"/> Less often than once a month                                                                                                                                                                                                                                                                      |                                                                                                                   |                                                                                                                   |
| Hand-Washing behavior | 12 | I washed my hands with soap ___ times yesterday. | <input type="checkbox"/> 0 <input type="checkbox"/> 1-2 <input type="checkbox"/> 3-4 <input type="checkbox"/> 5-6 <input type="checkbox"/> 7-12 <input type="checkbox"/> >12                                                                                                                                                     | <input type="checkbox"/> >12                                                                                      | <input type="checkbox"/> >12                                                                                      |
|                       | 13 | I have heard of antibacterial soap.              | <input type="checkbox"/> Yes <input type="checkbox"/> No [skip Q14/ Q15]                                                                                                                                                                                                                                                         | <input type="checkbox"/> Yes                                                                                      | <input type="checkbox"/> Yes                                                                                      |
|                       | 14 | I have antibacterial soap in my house.           | <input type="checkbox"/> Always <input type="checkbox"/> Often <input type="checkbox"/> Sometimes <input type="checkbox"/> Rarely <input type="checkbox"/> Never <input type="checkbox"/> I don't know                                                                                                                           | <input type="checkbox"/> Often                                                                                    | <input type="checkbox"/> Sometimes                                                                                |
|                       | 15 | Please select one answer                         | <input type="checkbox"/> I sometimes prefer to use an antibacterial soap over regular soap when washing my hands. <input type="checkbox"/> I always prefer to use an antibacterial soap over regular soap when washing my hands. <input type="checkbox"/> I don't think about the benefits an antibacterial soap might have over | <input type="checkbox"/> I sometimes prefer to use an antibacterial soap over regular soap when washing my hands. | <input type="checkbox"/> I sometimes prefer to use an antibacterial soap over regular soap when washing my hands. |

|  |    |                                                                     |                                                                                                                                                                                                                                                      |                                                           |                                                           |
|--|----|---------------------------------------------------------------------|------------------------------------------------------------------------------------------------------------------------------------------------------------------------------------------------------------------------------------------------------|-----------------------------------------------------------|-----------------------------------------------------------|
|  |    |                                                                     | regular soap when washing my hands.<br><br><input type="checkbox"/> I think about the benefits of an antibacterial soap but I choose not to use one                                                                                                  |                                                           |                                                           |
|  | 16 | I have heard of hand sanitizer.                                     | <input type="checkbox"/> Yes <input type="checkbox"/> No [skip Q17–Q19]                                                                                                                                                                              | <input type="checkbox"/> Yes                              | <input type="checkbox"/> Yes                              |
|  | 17 | I have hand sanitizer in my house.                                  | <input type="checkbox"/> Always <input type="checkbox"/> Often <input type="checkbox"/> Sometimes,<br><br><input type="checkbox"/> Rarely <input type="checkbox"/> Never <input type="checkbox"/> I don't know                                       | <input type="checkbox"/> Often                            | <input type="checkbox"/> Always                           |
|  | 18 | I often use a hand sanitizer when soap and water are not available. | <input type="checkbox"/> Strongly agree <input type="checkbox"/> Agree <input type="checkbox"/> Neutral <input type="checkbox"/> Disagree <input type="checkbox"/> Strongly disagree                                                                 | <input type="checkbox"/> Disagree                         | <input type="checkbox"/> Neutral                          |
|  | 19 | I regularly use hand sanitizer (multiple options possible):         | <input type="checkbox"/> after using the toilet <input type="checkbox"/> food before preparing food <input type="checkbox"/> before eating food <input type="checkbox"/> after petting my dog/cat <input type="checkbox"/> after preparing my dog's/ | <input type="checkbox"/> after disposal of my pet's feces | <input type="checkbox"/> after disposal of my pet's feces |

|  |    |                                                                     |                                                                                                                                                                      |                                 |                                    |
|--|----|---------------------------------------------------------------------|----------------------------------------------------------------------------------------------------------------------------------------------------------------------|---------------------------------|------------------------------------|
|  |    |                                                                     | cat's food <input type="checkbox"/> after handling my dog's/ cat's food bowl <input type="checkbox"/> after disposal of my pet's feces                               |                                 |                                    |
|  | 20 | I wash my hands with soap after using the toilet.                   | <input type="checkbox"/> Always <input type="checkbox"/> Often <input type="checkbox"/> Sometimes<br><input type="checkbox"/> Rarely <input type="checkbox"/> Never  | <input type="checkbox"/> Always | <input type="checkbox"/> Often     |
|  | 21 | I wash my hands with soap before preparing food.                    | <input type="checkbox"/> Always <input type="checkbox"/> Often <input type="checkbox"/> Sometimes<br><input type="checkbox"/> Rarely <input type="checkbox"/> Never  | <input type="checkbox"/> Always | <input type="checkbox"/> Often     |
|  | 22 | I wash my hands with soap before eating food.                       | <input type="checkbox"/> Always <input type="checkbox"/> Often <input type="checkbox"/> Sometimes,<br><input type="checkbox"/> Rarely <input type="checkbox"/> Never | <input type="checkbox"/> Always | <input type="checkbox"/> Often     |
|  | 23 | I wash my hands with soap after petting my dog/ cat.                | <input type="checkbox"/> Always <input type="checkbox"/> Often <input type="checkbox"/> Sometimes<br><input type="checkbox"/> Rarely <input type="checkbox"/> Never  | <input type="checkbox"/> Rarely | <input type="checkbox"/> Rarely    |
|  | 24 | I wash my hands with soap after preparing my dog's/ cat's food.     | <input type="checkbox"/> Always <input type="checkbox"/> Often <input type="checkbox"/> Sometimes<br><input type="checkbox"/> Rarely <input type="checkbox"/> Never  | <input type="checkbox"/> Often  | <input type="checkbox"/> Sometimes |
|  | 25 | I wash my hands with soap after handling my dog's/ cat's food bowl. | <input type="checkbox"/> Always <input type="checkbox"/> Often <input type="checkbox"/> Sometimes<br><input type="checkbox"/> Rarely <input type="checkbox"/> Never  | <input type="checkbox"/> Rarely | <input type="checkbox"/> Rarely    |

|                    |    |                                                                 |                                                                                                                                                                                                                                                             |                                                                   |                                                |
|--------------------|----|-----------------------------------------------------------------|-------------------------------------------------------------------------------------------------------------------------------------------------------------------------------------------------------------------------------------------------------------|-------------------------------------------------------------------|------------------------------------------------|
|                    | 26 | I wash my hands with soap after disposal of my pet's feces.     | <input type="checkbox"/> Always <input type="checkbox"/> Often <input type="checkbox"/> Sometimes<br><input type="checkbox"/> Rarely <input type="checkbox"/> Never                                                                                         | <input type="checkbox"/> Always                                   | <input type="checkbox"/> Often                 |
| Cleaning behavior: | 27 | I try to make sure I do a bit of cleaning around the house      | <input type="checkbox"/> Every day <input type="checkbox"/> More than once a week <input type="checkbox"/> Once a week <input type="checkbox"/> Every two weeks <input type="checkbox"/> Once a month <input type="checkbox"/> Less often than once a month | <input type="checkbox"/> More than once a week                    | <input type="checkbox"/> More than once a week |
|                    | 28 | I wipe the floor of my house                                    | <input type="checkbox"/> Every day <input type="checkbox"/> More than once a week <input type="checkbox"/> Once a week <input type="checkbox"/> Every two weeks <input type="checkbox"/> Once a month <input type="checkbox"/> Less often than once a month | <input type="checkbox"/> More than once a week                    | <input type="checkbox"/> Once a week           |
|                    | 29 | Please indicate what cleaning product you use to wipe the floor |                                                                                                                                                                                                                                                             | Vinegar cleaning product/<br>commercially available floor cleaner | all purpose cleaner                            |
| Bathroom           | 30 | I try to clean the bathroom thoroughly                          | <input type="checkbox"/> Every day <input type="checkbox"/> More than once a week <input type="checkbox"/> Once a week <input type="checkbox"/> Once every                                                                                                  | <input type="checkbox"/> More than once a week                    | <input type="checkbox"/> Once a week           |

|         |    |                                                                                    |                                                                                                                                                                                                                                                                                            |                                         |                                         |
|---------|----|------------------------------------------------------------------------------------|--------------------------------------------------------------------------------------------------------------------------------------------------------------------------------------------------------------------------------------------------------------------------------------------|-----------------------------------------|-----------------------------------------|
|         |    |                                                                                    | two weeks ■ Once a month ■ Less often than once a month                                                                                                                                                                                                                                    |                                         |                                         |
|         | 31 | I use separate cleaning materials (e.g. separate cleaning cloth) for the bathroom. | <input type="checkbox"/> Strongly agree <input type="checkbox"/> Agree <input type="checkbox"/> Neutral <input type="checkbox"/> Disagree <input type="checkbox"/> Strongly disagree                                                                                                       | <input type="checkbox"/> Strongly agree | <input type="checkbox"/> Agree          |
|         | 32 | Please indicate what cleaning product you use to clean the bathroom                |                                                                                                                                                                                                                                                                                            | commercially available bathroom cleaner | commercially available bathroom cleaner |
| Kitchen | 33 | I try to clean the kitchen thoroughly                                              | <input type="checkbox"/> Every day <input type="checkbox"/> More than once a week <input type="checkbox"/> Once a week <input type="checkbox"/> Every two weeks <input type="checkbox"/> Once a month <input type="checkbox"/> Less often than once a month                                | <input type="checkbox"/> Every day      | <input type="checkbox"/> Once a week    |
|         | 34 | I use a surface cleaner in the kitchen.                                            | <input type="checkbox"/> Every day <input type="checkbox"/> More than once a week <input type="checkbox"/> Once a week <input type="checkbox"/> Every two weeks <input type="checkbox"/> Once a month <input type="checkbox"/> Less often than once a month <input type="checkbox"/> Never | <input type="checkbox"/> Every day      | <input type="checkbox"/> Once a week    |



|  |    |                                         |                                                                                                                                                                                                                                                                                                                                                  |                                              |                                              |
|--|----|-----------------------------------------|--------------------------------------------------------------------------------------------------------------------------------------------------------------------------------------------------------------------------------------------------------------------------------------------------------------------------------------------------|----------------------------------------------|----------------------------------------------|
|  | 35 | I try to clean the fridge thoroughly    | <input type="checkbox"/> More than once a week <input type="checkbox"/> Once a week <input type="checkbox"/> Every two weeks <input type="checkbox"/> Once a month <input type="checkbox"/> Once every 3 months <input type="checkbox"/> Once every 6 months <input type="checkbox"/> Less often than once a year <input type="checkbox"/> Never | <input type="checkbox"/> Once every 3 months | <input type="checkbox"/> Once every 3 months |
|  | 36 | I wash or change kitchen towels         | <input type="checkbox"/> Every day <input type="checkbox"/> More than once a week <input type="checkbox"/> Once a week <input type="checkbox"/> Every two weeks <input type="checkbox"/> Once a month <input type="checkbox"/> Once every 3 months                                                                                               | <input type="checkbox"/> Once a week         | <input type="checkbox"/> Once a week         |
|  | 37 | I use disposable (kitchen) paper towels | <input type="checkbox"/> Yes <input type="checkbox"/> No                                                                                                                                                                                                                                                                                         | <input type="checkbox"/> Yes                 | <input type="checkbox"/> Yes                 |
|  | 38 | I wash or change kitchen sponges        | <input type="checkbox"/> Every day <input type="checkbox"/> More than once a week <input type="checkbox"/> Once a week <input type="checkbox"/> Every two weeks <input type="checkbox"/> Once a month <input type="checkbox"/> Once every 3 months                                                                                               | <input type="checkbox"/> Once a week         | <input type="checkbox"/> Every two weeks     |

|  |    |                                                                         |                                                                                                                                                                                                                               |                                 |                                    |
|--|----|-------------------------------------------------------------------------|-------------------------------------------------------------------------------------------------------------------------------------------------------------------------------------------------------------------------------|---------------------------------|------------------------------------|
|  | 39 | When preparing food, I clean the work surfaces between work steps.      | <input type="checkbox"/> Always <input type="checkbox"/> Often <input type="checkbox"/> Sometimes<br><input type="checkbox"/> Rarely <input type="checkbox"/> Never                                                           | <input type="checkbox"/> Always | <input type="checkbox"/> Sometimes |
|  | 40 | When preparing food, I clean my hands between work steps.               | <input type="checkbox"/> Always <input type="checkbox"/> Often <input type="checkbox"/> Sometimes<br><input type="checkbox"/> Rarely <input type="checkbox"/> Never                                                           | <input type="checkbox"/> Always | <input type="checkbox"/> Sometimes |
|  | 41 | I wash food for raw consumption, such as lettuce, vegetables and fruit. | <input type="checkbox"/> Always <input type="checkbox"/> Often <input type="checkbox"/> Sometimes<br><input type="checkbox"/> Rarely <input type="checkbox"/> Never                                                           | <input type="checkbox"/> Always | <input type="checkbox"/> Always    |
|  | 42 | I keep meat separate from other foods.                                  | <input type="checkbox"/> Always <input type="checkbox"/> Often <input type="checkbox"/> Sometimes<br><input type="checkbox"/> Rarely <input type="checkbox"/> Never <input type="checkbox"/> I don't keep meat in my house    | <input type="checkbox"/> Often  | <input type="checkbox"/> Sometimes |
|  | 43 | I use separate knives for meat and foods of non-animal origin.          | <input type="checkbox"/> Always <input type="checkbox"/> Often <input type="checkbox"/> Sometimes<br><input type="checkbox"/> Rarely <input type="checkbox"/> Never <input type="checkbox"/> I don't prepare meat in my house | <input type="checkbox"/> Never  | <input type="checkbox"/> Never     |
|  | 44 | I use separate chopping boards for meat and foods of non-animal origin. | <input type="checkbox"/> Always <input type="checkbox"/> Often <input type="checkbox"/> Sometimes<br><input type="checkbox"/> Rarely <input type="checkbox"/> Never <input type="checkbox"/> I don't prepare meat in my house | <input type="checkbox"/> Never  | <input type="checkbox"/> Never     |

|               |    |                              |                                                                                                                                                                                                                                                                      |                                                                          |                                          |
|---------------|----|------------------------------|----------------------------------------------------------------------------------------------------------------------------------------------------------------------------------------------------------------------------------------------------------------------|--------------------------------------------------------------------------|------------------------------------------|
| Dogs and cats | 45 | My pet lives inside my house | <input type="checkbox"/> Yes <input type="checkbox"/> No                                                                                                                                                                                                             | <input type="checkbox"/> Yes                                             | <input type="checkbox"/> Yes             |
|               | 46 | I wash my pet's toys         | <input type="checkbox"/> Every day <input type="checkbox"/> More than once a week <input type="checkbox"/> Once a week <input type="checkbox"/> Every two weeks <input type="checkbox"/> Once a month <input type="checkbox"/> Rarely <input type="checkbox"/> Never | <input type="checkbox"/> Never (toys will be thrown away and not washed) | <input type="checkbox"/> Rarely          |
|               | 47 | I wash my pet's bed          | <input type="checkbox"/> Every day <input type="checkbox"/> More than once a week <input type="checkbox"/> Once a week <input type="checkbox"/> Every two weeks <input type="checkbox"/> Once a month <input type="checkbox"/> Rarely <input type="checkbox"/> Never | <input type="checkbox"/> Once a month                                    | <input type="checkbox"/> Rarely          |
|               | 48 | I Hoover my pet's bed        | <input type="checkbox"/> Every day <input type="checkbox"/> More than once a week <input type="checkbox"/> Once a week <input type="checkbox"/> Every two weeks <input type="checkbox"/> Once a month <input type="checkbox"/> Rarely <input type="checkbox"/> Never | <input type="checkbox"/> More than once a week                           | <input type="checkbox"/> Every two weeks |
|               | 49 | I clean my pet's food bowl   | <input type="checkbox"/> Every day <input type="checkbox"/> More than once a week <input type="checkbox"/> Once a week <input type="checkbox"/> Every two                                                                                                            | <input type="checkbox"/> Every day                                       | <input type="checkbox"/> Every day       |

|  |    |                                                             |                                                                                                                                                                                                                                                                                                                                                          |                                                                                                                                                                           |                                                   |
|--|----|-------------------------------------------------------------|----------------------------------------------------------------------------------------------------------------------------------------------------------------------------------------------------------------------------------------------------------------------------------------------------------------------------------------------------------|---------------------------------------------------------------------------------------------------------------------------------------------------------------------------|---------------------------------------------------|
|  |    |                                                             | <input type="checkbox"/> weeks <input type="checkbox"/> Once a month <input type="checkbox"/> Rarely <input type="checkbox"/><br><input type="checkbox"/> Never                                                                                                                                                                                          |                                                                                                                                                                           |                                                   |
|  | 50 | I clean my pet's food bowl<br>(multiple answers possible)   | <input type="checkbox"/> With soap <input type="checkbox"/> With water <input type="checkbox"/> With<br><input type="checkbox"/> a separate cloth <input type="checkbox"/> With the same<br><input type="checkbox"/> cloth that I use for my other dishes<br><input type="checkbox"/> In the dishwasher                                                  | <input type="checkbox"/> With soap <input type="checkbox"/> With<br><input type="checkbox"/> water <input type="checkbox"/> In the<br><input type="checkbox"/> dishwasher | <input type="checkbox"/> With water               |
|  | 51 | My pet is allowed on the bed                                | <input type="checkbox"/> Yes <input type="checkbox"/> No                                                                                                                                                                                                                                                                                                 | <input type="checkbox"/> No                                                                                                                                               | <input type="checkbox"/> Yes                      |
|  | 52 | If Yes: How often does your pet<br>stay/ sleep in the bed?  | <input type="checkbox"/> Every day <input type="checkbox"/> More than once a<br><input type="checkbox"/> week <input type="checkbox"/> Once a week <input type="checkbox"/> Every two<br><input type="checkbox"/> weeks <input type="checkbox"/> Once a month <input type="checkbox"/> Rarely <input type="checkbox"/><br><input type="checkbox"/> Never | n.a.                                                                                                                                                                      | <input type="checkbox"/> More than once a<br>week |
|  | 53 | My pet is allowed on the sofa                               | <input type="checkbox"/> Yes <input type="checkbox"/> No                                                                                                                                                                                                                                                                                                 | <input type="checkbox"/> Yes                                                                                                                                              | <input type="checkbox"/> Yes                      |
|  | 54 | If Yes: How often does your pet<br>stay/ sleep on the sofa? | <input type="checkbox"/> Every day <input type="checkbox"/> More than once a<br><input type="checkbox"/> week <input type="checkbox"/> Once a week <input type="checkbox"/> Every two<br><input type="checkbox"/> weeks <input type="checkbox"/> Once a month <input type="checkbox"/> Rarely <input type="checkbox"/><br><input type="checkbox"/> Never | <input type="checkbox"/> Every day                                                                                                                                        | <input type="checkbox"/> Every day                |

|  |    |                                                                                                          |                                                                                                                                                                                                                                                                      |                                 |                                      |
|--|----|----------------------------------------------------------------------------------------------------------|----------------------------------------------------------------------------------------------------------------------------------------------------------------------------------------------------------------------------------------------------------------------|---------------------------------|--------------------------------------|
|  | 55 | My pet is allowed to lick my hands                                                                       | <input type="checkbox"/> Yes <input type="checkbox"/> No                                                                                                                                                                                                             | <input type="checkbox"/> No     | <input type="checkbox"/> Yes         |
|  | 56 | My pet is allowed to lick my face                                                                        | <input type="checkbox"/> Yes <input type="checkbox"/> No                                                                                                                                                                                                             | <input type="checkbox"/> No     | <input type="checkbox"/> No          |
|  | 57 | I groom my pet                                                                                           | <input type="checkbox"/> Every day <input type="checkbox"/> More than once a week <input type="checkbox"/> Once a week <input type="checkbox"/> Every two weeks <input type="checkbox"/> Once a month <input type="checkbox"/> Rarely <input type="checkbox"/> Never | <input type="checkbox"/> Rarely | <input type="checkbox"/> Rarely      |
|  | 58 | I remove my cat's feces from the litter box (only show this question for cat owners)                     | <input type="checkbox"/> Every day <input type="checkbox"/> More than once a week <input type="checkbox"/> Once a week <input type="checkbox"/> Rarely <input type="checkbox"/> My cat doesn't use a litter box                                                      | n.a.                            | <input type="checkbox"/> Once a week |
|  | 59 | I clean (e.g. change sand, wash, disinfect) my cat's litter box (only show this question for cat owners) | <input type="checkbox"/> Every day <input type="checkbox"/> More than once a week <input type="checkbox"/> Once a week <input type="checkbox"/> Rarely <input type="checkbox"/> My cat doesn't use a litter box                                                      | n.a.                            | <input type="checkbox"/> Rarely      |

|  |    |                                                                                    |                                                                                                                                                                                                                                                                                                                                                                                              |                                                                                                                         |                                                                                                                         |
|--|----|------------------------------------------------------------------------------------|----------------------------------------------------------------------------------------------------------------------------------------------------------------------------------------------------------------------------------------------------------------------------------------------------------------------------------------------------------------------------------------------|-------------------------------------------------------------------------------------------------------------------------|-------------------------------------------------------------------------------------------------------------------------|
|  | 60 | I clean up my dog's feces from the garden (only show this question for dog owners) | <input type="checkbox"/> Every day <input type="checkbox"/> More than once a week <input type="checkbox"/> Once a week <input type="checkbox"/> Every two weeks <input type="checkbox"/> Once a month <input type="checkbox"/> Rarely <input type="checkbox"/> Never <input type="checkbox"/> My dog is not allowed to defecate in the garden <input type="checkbox"/> I don't have a garden | <input type="checkbox"/> Every day                                                                                      | <input type="checkbox"/> Every day                                                                                      |
|  | 61 | I feed my pet the following diet (multiple answers possible):                      | <input type="checkbox"/> Dry food [skip Q62-64] <input type="checkbox"/> Canned/ semi-moist food [skip Q62-64] <input type="checkbox"/> Home-cooked [skip Q62-64] <input type="checkbox"/> Raw food                                                                                                                                                                                          | <input type="checkbox"/> Dry food <input type="checkbox"/> Canned/ semi-moist food <input type="checkbox"/> Home-cooked | <input type="checkbox"/> Dry food <input type="checkbox"/> Canned/ semi-moist food <input type="checkbox"/> Home-cooked |
|  | 62 | If raw food, please specify which kind (multiple answers possible):                | <input type="checkbox"/> Vegetable <input type="checkbox"/> Fruit <input type="checkbox"/> Chicken <input type="checkbox"/> Beef <input type="checkbox"/> Pork <input type="checkbox"/> Other:_____                                                                                                                                                                                          | n.a.                                                                                                                    | n.a.                                                                                                                    |
|  | 63 | If raw food, please specify where you purchase it (multiple answers possible):     | <input type="checkbox"/> Pet shop <input type="checkbox"/> Butcher <input type="checkbox"/> Supermarket <input type="checkbox"/> Online <input type="checkbox"/> Other:_____                                                                                                                                                                                                                 | n.a.                                                                                                                    | n.a.                                                                                                                    |

|  |    |                                                                              |                                                                                                                                                                                                                                                                                                                                                               |                                             |                                             |
|--|----|------------------------------------------------------------------------------|---------------------------------------------------------------------------------------------------------------------------------------------------------------------------------------------------------------------------------------------------------------------------------------------------------------------------------------------------------------|---------------------------------------------|---------------------------------------------|
|  | 64 | If raw food, please specify how you store it (multiple answers possible):    | <input type="checkbox"/> Separate freezer <input type="checkbox"/> Separate fridge <input type="checkbox"/> Same freezer as I use for my own food <input type="checkbox"/> Same fridge as I use for my own food <input type="checkbox"/> Other:_____                                                                                                          | n.a.                                        | n.a.                                        |
|  | 65 | Please indicate if one of the following applies:                             | <input type="checkbox"/> I am Pregnant <input type="checkbox"/> Pregnant person in household <input type="checkbox"/> I am Immunocompromised <input type="checkbox"/> Immunocompromised person in household <input type="checkbox"/> Children <2 years old in household <input type="checkbox"/> People >65 years old <input type="checkbox"/> Does not apply | <input type="checkbox"/> Does not apply     | <input type="checkbox"/> Does not apply     |
|  | 66 | If you wish, please feel free to specify any current illnesses               | <input type="checkbox"/> No current illness <input type="checkbox"/> _____                                                                                                                                                                                                                                                                                    | <input type="checkbox"/> No current illness | <input type="checkbox"/> No current illness |
|  | 67 | Have you had contact with the human health care system in the past 6 months? | <input type="checkbox"/> Yes <input type="checkbox"/> No [skip Q68/69]                                                                                                                                                                                                                                                                                        | <input type="checkbox"/> Yes                | <input type="checkbox"/> Yes                |

|  |    |                                                     |                                                                                                                                                                                                                                                                                                                                                                                               |                                                      |                                                                                                                               |
|--|----|-----------------------------------------------------|-----------------------------------------------------------------------------------------------------------------------------------------------------------------------------------------------------------------------------------------------------------------------------------------------------------------------------------------------------------------------------------------------|------------------------------------------------------|-------------------------------------------------------------------------------------------------------------------------------|
|  | 68 | If YES, which kind?                                 | <input type="checkbox"/> General practitioner visits <input type="checkbox"/><br><input type="checkbox"/> Hospital visits <input type="checkbox"/> Hospitalization <input type="checkbox"/><br><input type="checkbox"/> Nursing home visits <input type="checkbox"/> Relatives<br>receiving health care <input type="checkbox"/> Relatives<br><input type="checkbox"/> working in health care | <input type="checkbox"/> General practitioner visits | <input type="checkbox"/> General practitioner visits <input type="checkbox"/><br><input type="checkbox"/> Nursing home visits |
|  | 69 | If hospitalization, how many days?                  |                                                                                                                                                                                                                                                                                                                                                                                               | n.a.                                                 | n.a.                                                                                                                          |
|  | 70 | Have you had diarrhea during the past 12 months?    | <input type="checkbox"/> Yes <input type="checkbox"/> No [skip Q71–73]                                                                                                                                                                                                                                                                                                                        | <input type="checkbox"/> Yes                         | <input type="checkbox"/> Yes (Norovirus)                                                                                      |
|  | 71 | If yes, when?                                       | <input type="checkbox"/> At the moment <input type="checkbox"/> <3 months ago<br><input type="checkbox"/> <6 months ago <input type="checkbox"/> <12 months ago                                                                                                                                                                                                                               | <input type="checkbox"/> <3 months ago               | <input type="checkbox"/> <12 months ago                                                                                       |
|  | 72 | If yes, did you take anti-diarrheal drugs?          | <input type="checkbox"/> Yes <input type="checkbox"/> No                                                                                                                                                                                                                                                                                                                                      | <input type="checkbox"/> No                          | <input type="checkbox"/> No                                                                                                   |
|  | 73 | If yes, do you currently take anti-diarrheal drugs? | <input type="checkbox"/> Yes <input type="checkbox"/> No                                                                                                                                                                                                                                                                                                                                      | <input type="checkbox"/> No                          | <input type="checkbox"/> No                                                                                                   |



|  |    |                                                                                                           |                                                                                                                                                                                                                                           |                                                       |                                        |
|--|----|-----------------------------------------------------------------------------------------------------------|-------------------------------------------------------------------------------------------------------------------------------------------------------------------------------------------------------------------------------------------|-------------------------------------------------------|----------------------------------------|
|  | 74 | Have you been diagnosed with a bacterial gastrointestinal disease (e.g., Salmonella) in the last 2 years? | <input type="checkbox"/> Yes <input type="checkbox"/> No [skip Q75/76]                                                                                                                                                                    | <input type="checkbox"/> No                           | <input type="checkbox"/> No            |
|  | 75 | If yes, when?                                                                                             | <input type="checkbox"/> At the moment <input type="checkbox"/> <3 months ago<br><input type="checkbox"/> <6 months ago <input type="checkbox"/> <1 year ago <input type="checkbox"/> <2 years ago                                        | n.a.                                                  | n.a.                                   |
|  | 76 | If Yes: indicate which pathogen and approx. date (if you remember):                                       |                                                                                                                                                                                                                                           | n.a.                                                  | n.a.                                   |
|  | 77 | Have you ever received antibiotic treatment in the past?                                                  | <input type="checkbox"/> Yes <input type="checkbox"/> No [skip Q78/79]                                                                                                                                                                    | <input type="checkbox"/> Yes                          | <input type="checkbox"/> Yes           |
|  | 78 | If yes, when?                                                                                             | <input type="checkbox"/> At the moment <input type="checkbox"/> <3 months ago<br><input type="checkbox"/> <1 year ago <input type="checkbox"/> <2 years ago <input type="checkbox"/> > 2 years ago <input type="checkbox"/> > 5 years ago | <input type="checkbox"/> > 5 years ago (20 years ago) | <input type="checkbox"/> > 2 years ago |
|  | 79 | If yes, which antibiotic?                                                                                 |                                                                                                                                                                                                                                           | n.k.                                                  | Amoxicillin and Clavulanic Acid        |

|        |    |                                                                                      |                                                                                                                                                                                                                                                                                                      |                                                |                                       |
|--------|----|--------------------------------------------------------------------------------------|------------------------------------------------------------------------------------------------------------------------------------------------------------------------------------------------------------------------------------------------------------------------------------------------------|------------------------------------------------|---------------------------------------|
| Diet   | 80 | What kind of diet do you usually follow?                                             | <input type="checkbox"/> Omnivore <input type="checkbox"/> Vegetarian <input type="checkbox"/> Vegan <input type="checkbox"/> Rawist                                                                                                                                                                 | <input type="checkbox"/> Omnivore              | <input type="checkbox"/> Omnivore     |
|        | 81 | I eat raw meat and/or raw fish _____.                                                | <input type="checkbox"/> Every day <input type="checkbox"/> Every other day <input type="checkbox"/> Twice a week <input type="checkbox"/> Once a week <input type="checkbox"/> Every two weeks <input type="checkbox"/> Once a month <input type="checkbox"/> Rarely <input type="checkbox"/> Never | <input type="checkbox"/> Rarely                | <input type="checkbox"/> Rarely       |
|        | 82 | I eat fresh vegetables and/or fruit _____.                                           | <input type="checkbox"/> Every day <input type="checkbox"/> Every other day <input type="checkbox"/> Twice a week <input type="checkbox"/> Once a week <input type="checkbox"/> Every two weeks <input type="checkbox"/> Once a month <input type="checkbox"/> Rarely <input type="checkbox"/> Never | <input type="checkbox"/> Every other day       | <input type="checkbox"/> Twice a week |
|        | 83 | I eat fresh cheese and/or dairy products _____.                                      | <input type="checkbox"/> Every day <input type="checkbox"/> More than once a week <input type="checkbox"/> Once a week <input type="checkbox"/> Every two weeks <input type="checkbox"/> Once a month <input type="checkbox"/> Rarely <input type="checkbox"/> Never                                 | <input type="checkbox"/> More than once a week | <input type="checkbox"/> Every day    |
| Travel | 84 | Did you visit other countries for more than two days (>2 days) during the last year? | <input type="checkbox"/> Yes <input type="checkbox"/> No [skip Q85]                                                                                                                                                                                                                                  | <input type="checkbox"/> Yes                   | <input type="checkbox"/> Yes          |

|       |    |                                                                           |                                                                                                                                                                                                                                                          |                                                                                                                                                                               |                                                                                                                |
|-------|----|---------------------------------------------------------------------------|----------------------------------------------------------------------------------------------------------------------------------------------------------------------------------------------------------------------------------------------------------|-------------------------------------------------------------------------------------------------------------------------------------------------------------------------------|----------------------------------------------------------------------------------------------------------------|
|       | 85 | If Yes, please select where<br>(multiple answers possible):               | <input type="checkbox"/> Europe <input type="checkbox"/> Asia <input type="checkbox"/> North America<br><input type="checkbox"/> South America <input type="checkbox"/> Australia <input type="checkbox"/><br>Africa <input type="checkbox"/> Antarctica | <input type="checkbox"/> Europe <input type="checkbox"/> Asia                                                                                                                 | <input type="checkbox"/> Europe                                                                                |
|       | 86 | Please feel free to provide<br>city/country, number of days,<br>and when: |                                                                                                                                                                                                                                                          | <input type="checkbox"/> Thailand<br><br><input type="checkbox"/> Italy (Como Lake)<br><br><input type="checkbox"/> Mallorca<br><br><input type="checkbox"/> Germany (Allgäu) | <input type="checkbox"/> Italy<br><br><input type="checkbox"/> Austria<br><br><input type="checkbox"/> Germany |
| Other | 87 | Is there anything else you<br>would like us to know?                      |                                                                                                                                                                                                                                                          | no                                                                                                                                                                            | Due to work in<br>nursing home daily<br>contact to patients.<br><br>Colonized dog has<br>diabetes.             |

n.a., not applicable; n.k., not known

**Table S3:** List of high-touch surfaces in the veterinary clinic

| <b>Abbreviation<br/>(strain ID)</b> | <b>Surface</b>           |
|-------------------------------------|--------------------------|
| a                                   | oxygen cage              |
| b                                   | phone                    |
| c                                   | PC keyboard              |
| d                                   | PC mouse                 |
| e                                   | examination table        |
| f                                   | water tap                |
| g                                   | drawer                   |
| h                                   | large cabinet            |
| i                                   | small cabinet            |
| j                                   | area of drug preparation |

|   |                        |
|---|------------------------|
| k | storage box            |
| l | fridge with medication |
| m | infusion pump          |
| n | thermometer            |
| o | stethoscope            |
| p | soap                   |
| q | alcohol                |
| r | cat cage               |
| s | dog cage               |
| t | blood pressure monitor |
| u | wastewater channel     |
| v | floor                  |

|   |                 |
|---|-----------------|
| w | scale (floor)   |
| x | scale (display) |
| y | scissors        |

**Table S4:** List of high-touch surfaces in the households of colonized pets

| <b>Abbreviation<br/>(strain ID)</b> | <b>Surface household 1</b>          | <b>Surface household 2</b> |
|-------------------------------------|-------------------------------------|----------------------------|
| a                                   | leash                               |                            |
| b                                   | dog's blanket (car)                 | dog's sleeping basket      |
| c                                   | water bowl                          |                            |
| d                                   | feeding bowl                        |                            |
| e                                   | dog/ cat toy                        |                            |
| f                                   | dog's sleeping basket (living room) | dog's sleeping basket      |
| g                                   | dog's blanket on terrace            | cat's sleeping basket      |
| h                                   | dog's sleeping basket (bedroom)     | sunbed                     |
| i                                   | drain                               |                            |
| j                                   | bidet                               | cat's toilet               |

|   |                        |                         |
|---|------------------------|-------------------------|
| k | toilet                 |                         |
| l | floor                  |                         |
| m | carpet                 |                         |
| n | kitchen drain          |                         |
| o | drain (shower)         | bed                     |
| p | door handle            |                         |
| q | washing machine        |                         |
| r | bathroom guests        | carpet bathroom         |
| s | door handle            |                         |
| t | door handle (entrance) |                         |
| u | sofa                   |                         |
| v | dishwasher             | furniture (living room) |



|   |                 |
|---|-----------------|
| w | Fridge          |
| x | cleaning sponge |
| y | kitchen sponge  |
